# Supplementary material for: Tuning the nanoarchitectonics of NaNbO 3 for overall photocatalytic nitrogen fixation: insights into defect engineering and heteroatom doping
Source: Royal Society of Chemistry journal article supplement (doi:10.1039/d5nr03473f), 2026-01-01
Supplement: d5nr03473f1.pdf [file d5nr03473f1.pdf]

## Supporting Information

### Tuning the Nanoarchitectonics of NaNbO<sub>3</sub> for Overall Photocatalytic Nitrogen Fixation: Insights into Defect Engineering and Heteroatom Doping

Manisha Sharma,<sup>1</sup> Devanshu Sajwan,<sup>1</sup> Erika Yesepu,<sup>2</sup> Bhagyashree Priyadarshini Mishra,<sup>1</sup>  
Abhijit Patra,<sup>2</sup> and Venkata Krishnan<sup>1\*</sup>

<sup>1</sup>School of Chemical Sciences and Advanced Materials Research Center, Indian Institute of  
Technology Mandi, Kamand, Mandi 175075, Himachal Pradesh, India.

<sup>2</sup>Department of Chemistry, Indian Institute of Science Education and Research Bhopal,  
Bhopal 462066, Madhya Pradesh, India.

\*Corresponding author: [vkn@iitmandi.ac.in](mailto:vkn@iitmandi.ac.in)

| Sl. No. | Content                                                                                                                              | Pg. No. |
|---------|--------------------------------------------------------------------------------------------------------------------------------------|---------|
| 1.      | Materials characterization                                                                                                           | S-3     |
| 2.      | Quantification of NH <sub>3</sub> using different methods                                                                            | S-4     |
| 3.      | Quantification of N <sub>2</sub> H <sub>4</sub> using Watt-Chrisp method                                                             | S-5     |
| 4.      | Quantification of NO <sub>3</sub> <sup>-</sup> and NO <sub>2</sub> <sup>-</sup> species                                              | S-6     |
| 5.      | Preparation of samples for PL and photocurrent studies                                                                               | S-7     |
| 6.      | Calculated lattice parameters, crystallite size and lattice strain                                                                   | S-8     |
| 10.     | Calculated band gaps of as-synthesized samples using Tauc plots                                                                      | S-9     |
| 11.     | Band diagram of NNO, DNNO2 and NVNO0.25                                                                                              | S-10    |
| 12.     | TPD plots of NNO, DNNO2 and NVNO0.25                                                                                                 | S-11    |
| 13.     | EPR spectra                                                                                                                          | S-12    |
| 14.     | Multi point BET and pore size distribution curves                                                                                    | S-13    |
| 15.     | Calibration curve for Nessler's reagent method and N <sub>2</sub> H <sub>4</sub> .                                                   | S-14    |
| 16.     | Calculated yield for all the samples                                                                                                 | S-15    |
| 17.     | Ion chromatograms obtained for different photocatalysts for determination of NO <sub>3</sub> <sup>-</sup> ions and calibration curve | S-16    |
| 18.     | Calibration curve for NO <sub>2</sub> <sup>-</sup> and calculated yield of NO <sub>2</sub> <sup>-</sup>                              | S-18    |
| 19.     | NMR for NH <sub>3</sub> determined using NVNO0.25                                                                                    | S-19    |
| 20.     | UV-vis and absorption spectra of controlled studies                                                                                  | S-20    |

|     |                                                                          |      |
|-----|--------------------------------------------------------------------------|------|
| 21. | Calculation of light to chemical conversion (LCC)                        | S-21 |
| 22. | Calculation of turn over frequency (TOF)                                 | S-22 |
| 23. | Comparison of photoactivity of different materials.                      | S-24 |
| 23. | Histogram for recyclability and PXRD pattern of recycled sample          | S-25 |
| 24. | Lifetime decay curves of NNO, DNNO <sub>2</sub> and NVNO <sub>0.25</sub> | S-26 |
| 25. | References                                                               | S-27 |

## S1. Materials characterization

Powder X-ray diffraction (PXRD) measurements were done in  $2\theta$  ranging from  $5^\circ$  to  $80^\circ$  by using Rikagu SmartLab rotating anode X-ray diffractometer (9 kV) with Ni-filtered  $\text{Cu K}\alpha$  irradiation having wavelength 0.1542 nm with a scanning rate of  $2^\circ \text{C min}^{-1}$  with 45 kV and 100 mA. Raman spectroscopic studies were carried out with high-resolution Horiba LabRAM using a 532 nm laser for excitation. FTIR measurements were done on PerkinElmer Spectrum 2 spectrometer in the range 400 to  $4000 \text{ cm}^{-1}$ . Photoluminescence (PL) studies were done on Agilent Technologies Cary Eclipse fluorescence spectrophotometer. The absorbance of as-prepared samples was recorded by using diffuse reflectance spectroscopy (DRS) employing polytetrafluoroethylene (PTFE) polymer as a standard on Perkin Elmer UV-visible-NIR lambda 750 spectrophotometer. The morphological studies were done by scanning electron microscope (SEM), FEI Nova Nano SEM-450 instrument, and high-resolution images were taken on transmission electron microscope (TEM), FEI Technai G 20 S-twin microscope operating at 200 kV. X-ray photoelectron spectroscopy (XPS) studies were performed on the samples using ThermoFisher Scientific NEXSA photoemission spectrometer working at 12 kV anode voltage and 6.50 mA filament current using  $\text{Al K}\alpha$  (1486.6 eV) anode as a source. The obtained data were analyzed using Avantage software. EPR spectra were recorded on Bruker EMX MicroX spectrometer. The TGA analysis was done on the NETZSCH STA 449 F1 Jupiter. About 2 mg of sample was heated under a nitrogen atmosphere from room temperature to  $800^\circ \text{C}$  at a heating rate of  $10^\circ \text{C min}^{-1}$ . The BEL/CAT2 instrument was used for temperature programmed desorption studies (TPD). The Brunauer-Emmett-Teller (BET) surface area studies were carried out at 77 K on Quantachrome Autosorb-iQ-MP-XR system. Mott-Schottky and photocurrent studies were done on AUTOLAB electrochemical workstation. The photocatalytic experiments were done in a home-built photoreactor setup consisting of three 45 W white LED lamps and UV-vis spectra of collected samples were recorded on Shimadzu UV-2450 spectrophotometer. The nuclear magnetic resonance (NMR) spectra were measured using a JEOL-USA (JNMECX500) spectrometer in  $\text{DMSO-d}_6$  using tetramethyl silane (TMS) as an internal standard. The coupling constant “J” was calculated in Hz.  $^1\text{H}$ -NMR spectra were recorded at 500 MHz frequency. The fluorescence lifetime was measured using Horiba Scientific Delta Flex TSCPC system with pulsed nanoLED sources.

## **S2. Quantification of NH<sub>3</sub> using Different Methods**

### **(1) Nessler's Reagent**

The quantification of NH<sub>3</sub> using Nessler's reagent method was done using UV-vis spectroscopy. For NH<sub>3</sub> detection, standard stock solutions with concentrations of 3.12, 6.25, 12.50, 25, 50, 100 μM were prepared using NH<sub>4</sub>Cl. For quantification, 1 mL of ammonia mixture was taken in a vial, to which 50 μL of sodium potassium tartrate (C<sub>4</sub>H<sub>4</sub>O<sub>6</sub>KNa·4H<sub>2</sub>O) and 100 μL of Nessler's reagent was added. The UV-vis measurement was carried out in the range of 200-800 nm to obtain the analogous calibration curve. In this method, iodide and mercury ions react with ammonia under alkaline conditions to produce a reddish brown complex which shows absorbance at 420 nm. The corresponding amount was quantified with respect to the measured absorbance value and was compared with absorbance of standard solutions.<sup>1</sup>

### **(2) Nuclear Magnetic Resonance (NMR)**

The amount of NH<sub>3</sub> produced in the reaction mixture was also determined using NMR. 30 mL of reaction mixture was taken out after centrifugation. Afterward, 2M H<sub>2</sub>SO<sub>4</sub> was added to the reaction mixture until the pH was equal to 2. Then, the solution was evaporated using rotary evaporator until 1 mL of the mixture remained. 700 μL of the remaining mixture and 300 μL DMSO-d<sub>6</sub> were mixed. Afterward, 800 μL solution was taken out and NMR spectra was recorded. The number of scans to record the NMR spectra were kept at 8000.

### **S3. Quantification of Hydrazine using Watt & Chrisp method**

The presence of hydrazine ( $\text{N}_2\text{H}_4$ ) is determined by Watt and Chrisp method.<sup>2</sup> 2g of para (dimethylamino) benzaldehyde with 10 mL of concentrated HCl and 100 mL of ethanol were mixed. The above solution mixture was used as a reagent for hydrazine test. For the detection of hydrazine, 1 mL of ammonia mixture was taken in a vial with 1 mL of reagent mixture. The solution was left to react for 1 h at room temperature and then the absorbance was measured at 455 nm using a UV-VIS spectrophotometer. The concentration of  $\text{N}_2\text{H}_4$  was determined by comparing the measured absorbance to a calibration curve generated using standard solutions of  $\text{N}_2\text{H}_4$ .

#### **S4. Quantification of nitrate ( $\text{NO}_3^-$ ) and nitrite ( $\text{NO}_2^-$ )**

The quantification of  $\text{NO}_3^-$  and  $\text{NO}_2^-$  ions was done using UV-vis spectroscopy. For  $\text{NO}_3^-$  ion detection, standard stock solutions with varying concentrations (0 to 100  $\mu\text{mol L}^{-1}$ ) were prepared using  $\text{NaNO}_3$ . Then, 1 mL of standard solution was taken, and UV-vis measurement was carried out in the range of 200-300 nm to obtain the analogous calibration curve. Similarly, the amount of  $\text{NO}_3^-$  present in the reaction mixture was determined using UV-vis spectrophotometer, wherein the peak at 220 nm of wavelength corresponds to the absorption of nitrates and the corresponding amount was quantified with respect to the measured absorbance value.

For the detection of  $\text{NO}_2^-$ , a diazotization reaction was carried out. In diazotization reaction, sulfanilamide reacts with  $\text{NO}_2^-$  ions under an acidic environment, followed by coupling with N-(1-naphthyl) ethylenediamine dihydrochloride, resulting in pink azo dyes. Two reagents were separately prepared for the detection of  $\text{NO}_2^-$  ions. Firstly, 0.5 g of sulfanilamide was dissolved in 50 mL of 2 M HCl, and the solution was named reagent A. 20 mg of N-(1-naphthyl) ethylenediamine dihydrochloride was dissolved in 20 mL of deionized water and named as reagent B. For the calibration curve, 1 mL of standard or sample solutions were taken in glass vials, to which 20  $\mu\text{L}$  of A was added and allowed to stand for 10 min, followed by the addition of 20  $\mu\text{L}$  of B, respectively. After mild shaking, the solution mixture was kept undisturbed for 30 min and the amount of  $\text{NO}_2^-$  was estimated at the wavelength of 540 nm, from which calibration curves were extracted and plotted.

#### **S5. Preparation of samples for photoluminescence (PL) and photocurrent studies**

For PL studies, the 2 mg of photocatalysts (NNO, DNNO1, DNNO2, DNNO3, NVNO0.25, NVNO0.50 and NVNO0.75) was measured and dispersed in 4 mL of deionized water. The resultant solutions were sonicated for 30 min and then subjected to the PL studies. The excitation wavelength used in this study was 320 nm.

For photocurrent studies, the measured quantity (5 mg) of photocatalysts (NNO, DNNO2 and NVNO0.25) was taken. Then, 400  $\mu$ L of deionized water and 400  $\mu$ L of IPA were added to each of the catalysts separately. Further, 10  $\mu$ L of Nafion was added to the resultant mixtures of catalysts and subjected to the sonication for 30 min. Afterward, the 40  $\mu$ L of resultant solutions were dispersed on indium tin oxide (ITO) substrates. 0.1 M of  $\text{Na}_2\text{SO}_4$  solution was used as electrolyte solution and photocurrent studies were recorded at 0 V vs Ag/AgCl.

**Table S1.** Calculated lattice parameters of pristine NNO, oxygen vacancy-rich (DNNO1, DNNO2, DNNO3) and V-doped samples (NVNO0.25, NVNO0.50, NVNO0.75).

| Sl. No. | Sample Name | Average Crystallite Size (nm) | Lattice Strain ( $\epsilon \times 10^{-3}$ ) | Lattice Parameters (nm)         |
|---------|-------------|-------------------------------|----------------------------------------------|---------------------------------|
| 1.      | NNO         | 20.36                         | 5.11                                         | a = 0.384, b = 0.391, c = 0.419 |
| 2.      | DNNO1       | 26.32                         | 3.29                                         | a = 0.384, b = 0.389, c = 0.397 |
| 3.      | DNNO2       | 21.09                         | 4.60                                         | a = 0.387, b = 0.387, c = 0.386 |
| 4.      | DNNO3       | 28.96                         | 2.99                                         | a = 0.387, b = 0.387, c = 0.386 |
| 5.      | NVNO.25     | 20.11                         | 5.84                                         | a = 0.389, b = 0.388, c = 0.396 |
| 6.      | NVNO0.50    | 19.30                         | 6.15                                         | a = 0.389, b = 0.388, c = 0.378 |
| 7.      | NVNO0.75    | 29.27                         | 3.93                                         | a = 0.389, b = 0.389, c = 0.396 |



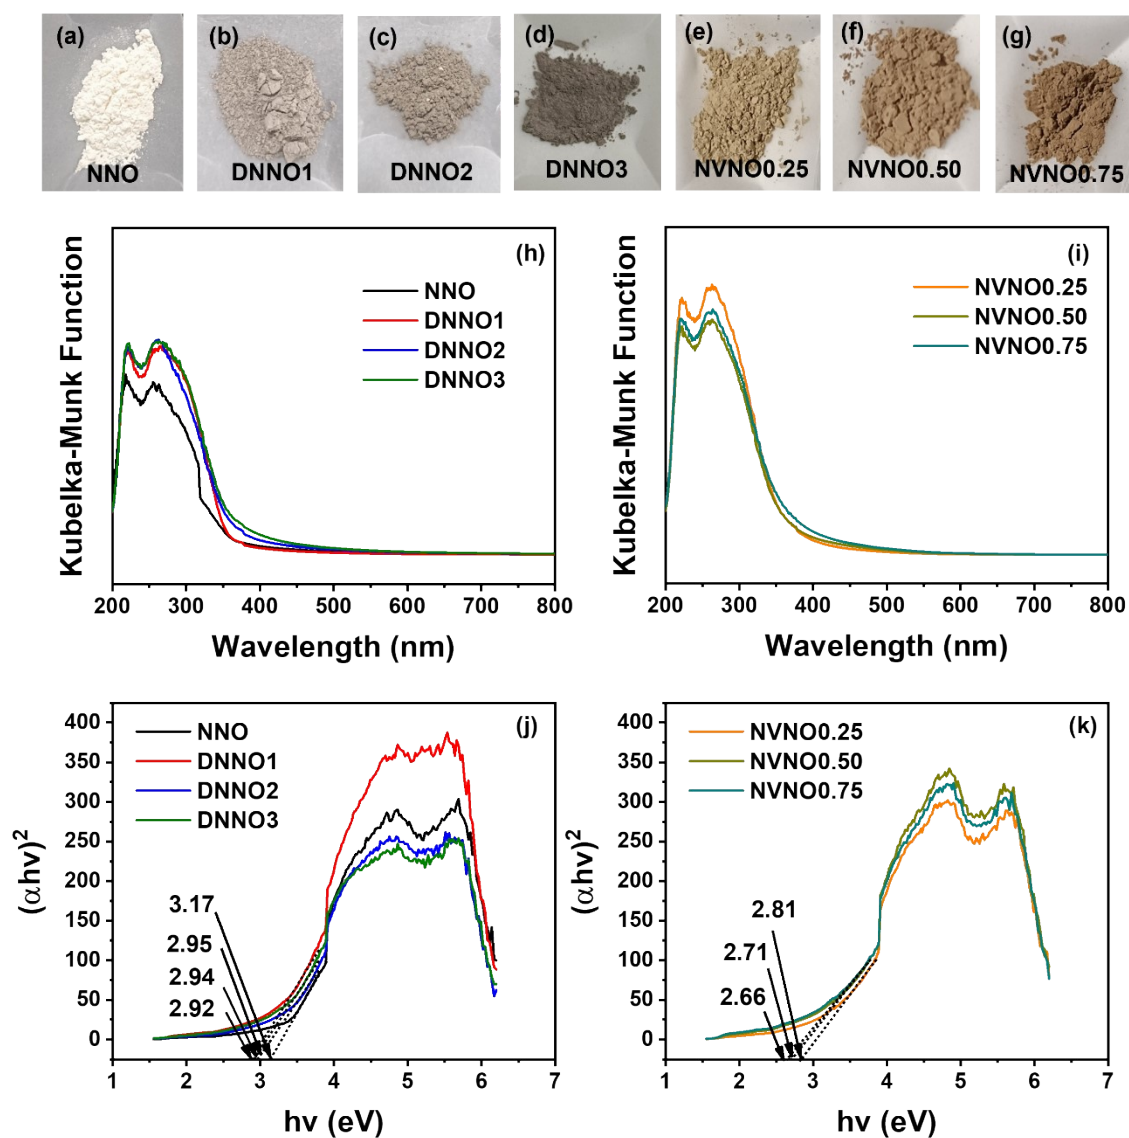

**Figure S1.** Photographs of (a) pristine NNO; (b-d) oxygen vacancy rich samples (DNN01, DNN02 and DNN03) and (e-g) V-doped samples (NVNO0.25, NVNO0.50 and NVNO0.75), respectively; (h, i) Absorption spectra and (j, k) calculated band gaps of samples (NNO, DNN01, DNN02, DNN03, NVNO0.25, NVNO0.50 and NVNO0.75).

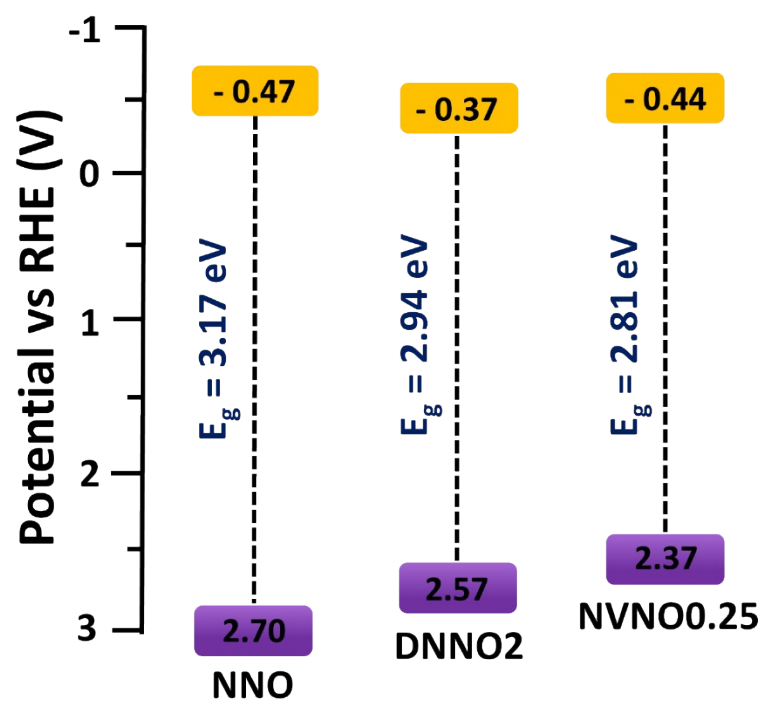

**Figure S2.** Band diagram of NNO, DNNO2 and NVNO0.25.

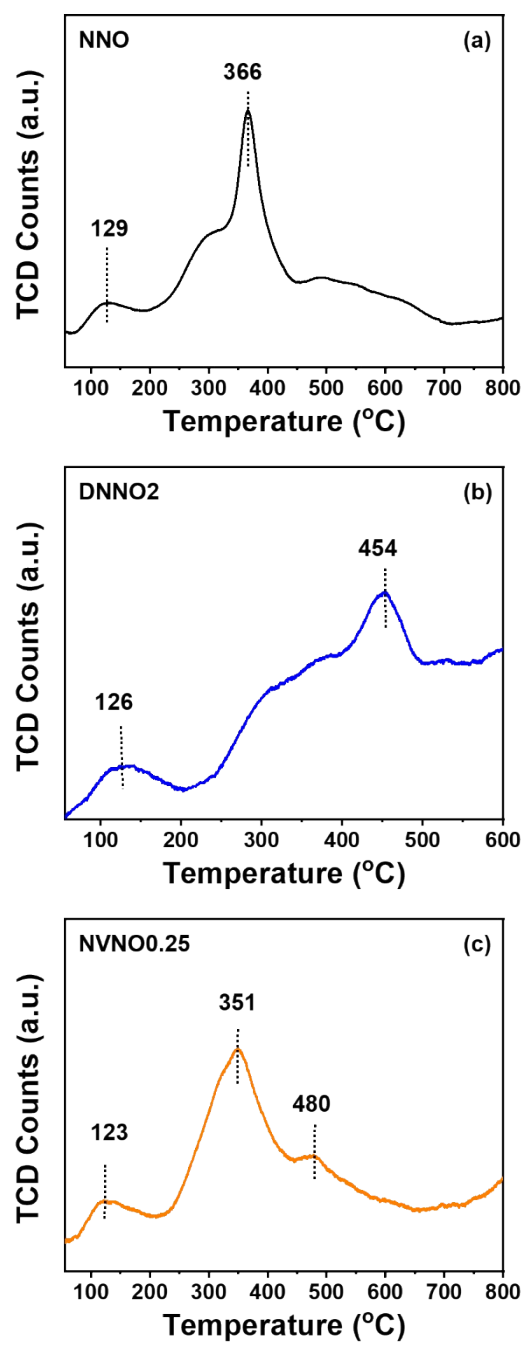

**Figure S3.** TPD curves of NNO, DNNO2 and NVNO0.25.

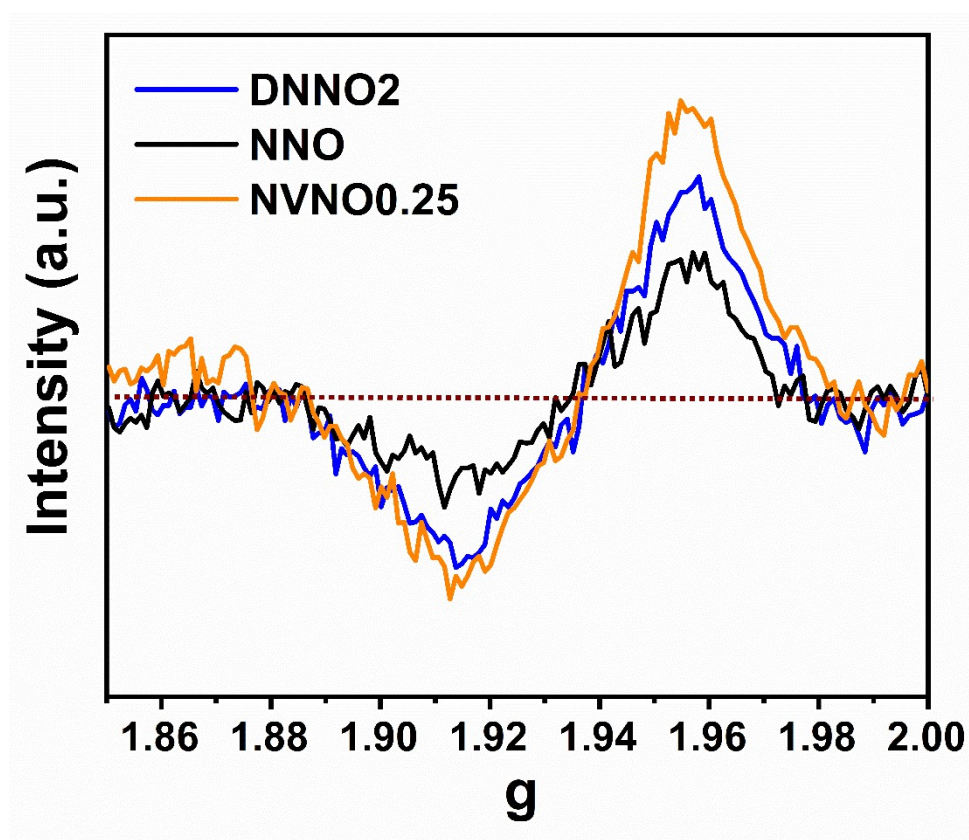

**Figure S4.** EPR spectra of NNO, DNNO2 and NVNO0.25.

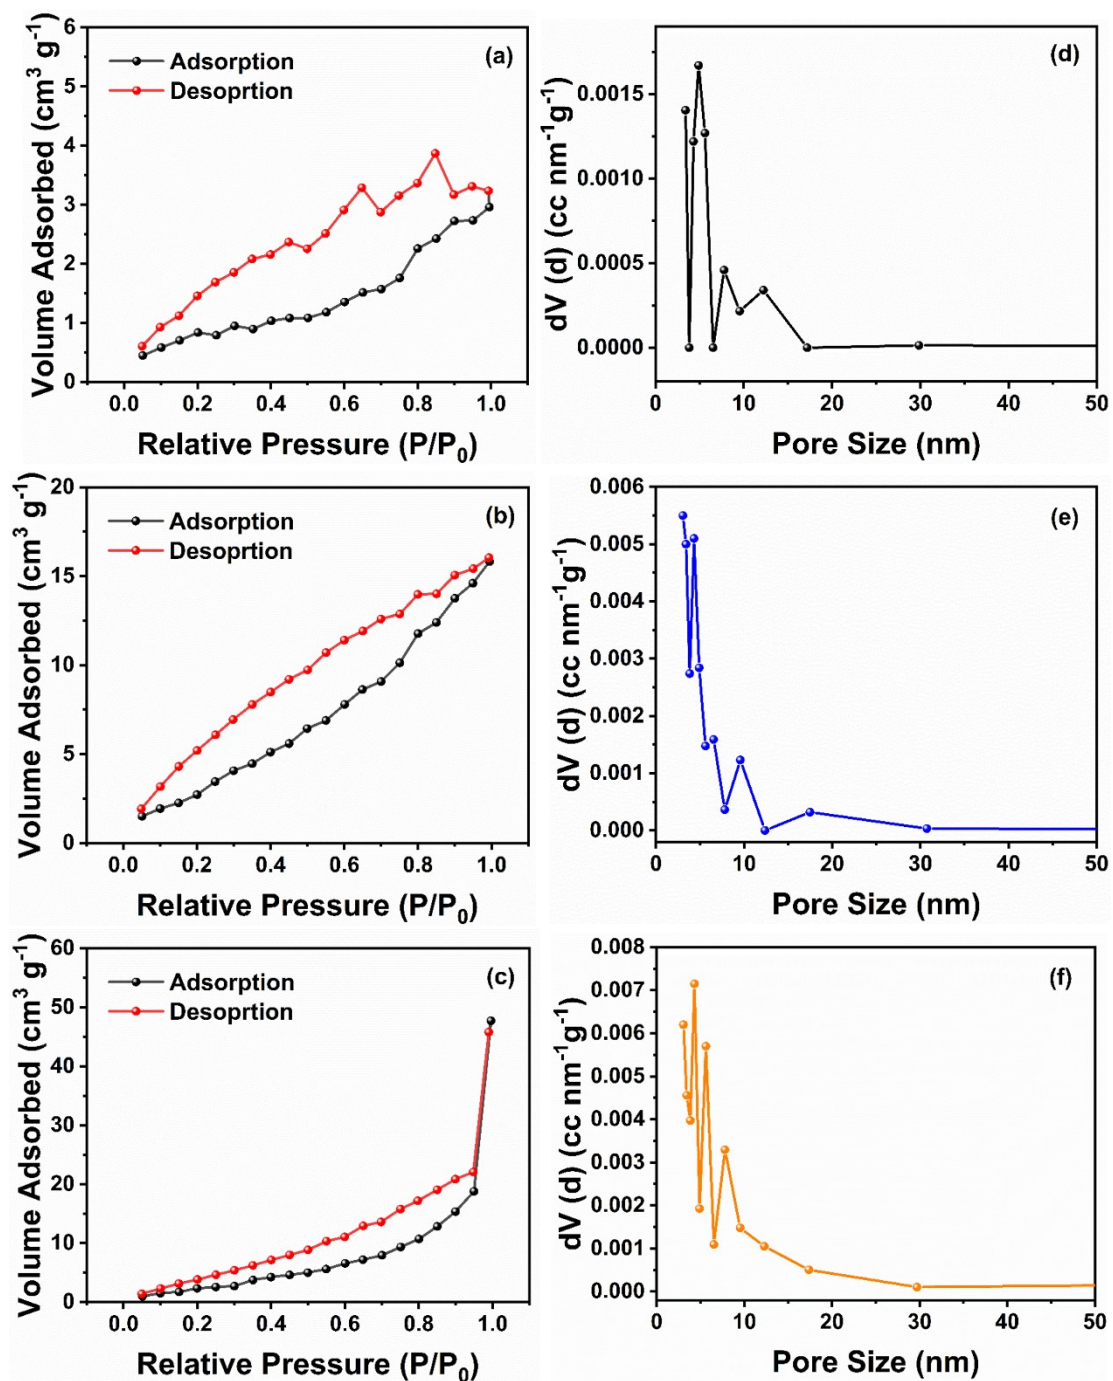

**Figure S5.** (a-c) N<sub>2</sub> adsorption-desorption isotherms; (d-f) pore size distribution in NNO, DNNO<sub>2</sub> and NVNO<sub>0.25</sub>, respectively.

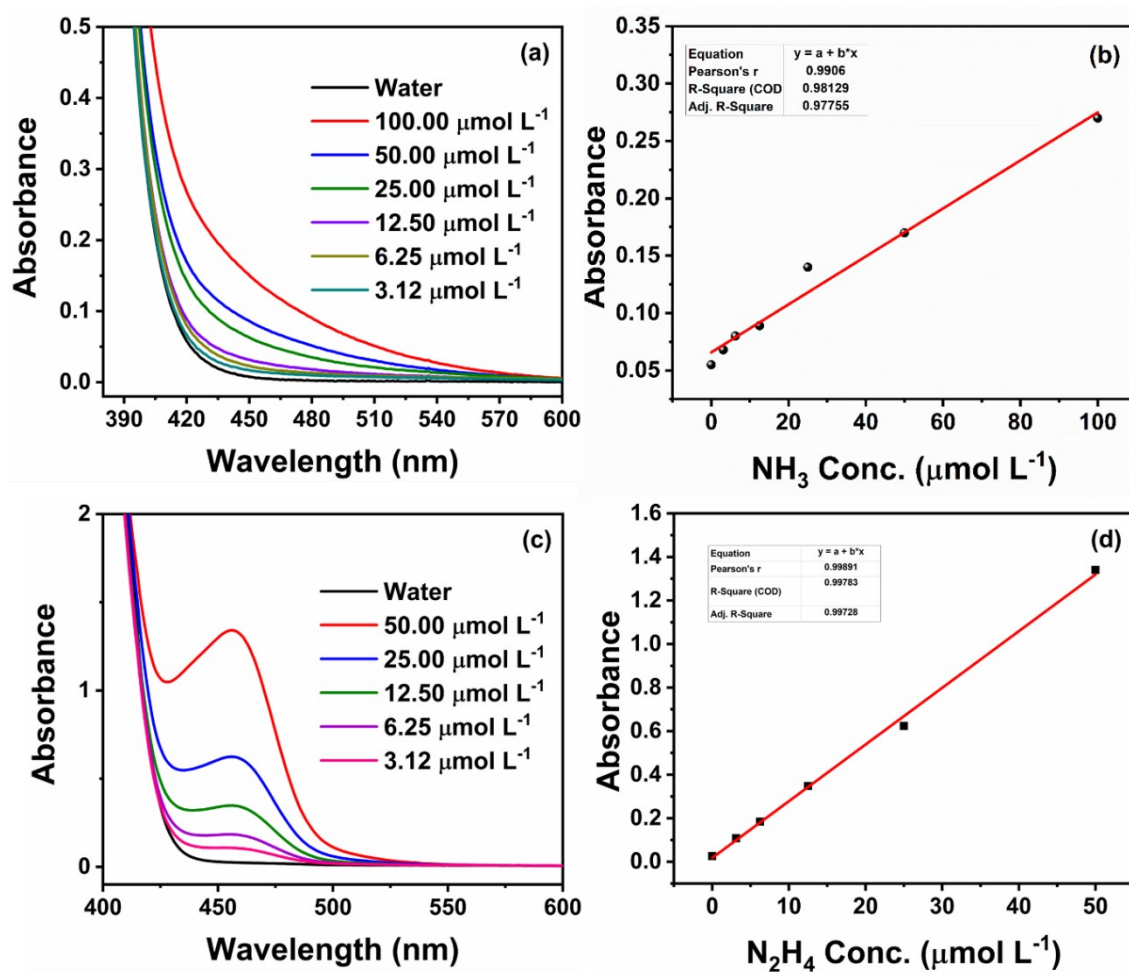

**Figure S6.** (a, b) Calibration curves for the determination of  $\text{NH}_3$  using Nessler's reagent method; (c, d) Calibration curves for the determination of  $\text{N}_2\text{H}_4$  using Watt-Chrisp method.

### S5. Calculation of yield for all photocatalysts:

The yield ( $\mu\text{mol g}^{-1} \text{h}^{-1}$ ) was obtained using the following equation:<sup>3</sup>

$$\text{Yield} = \frac{\text{Ammonia yield } (\mu\text{mol}) \times \text{Amount of water (L)}}{t \text{ (h)} \times \text{weight of catalyst (g)}}$$

Here, t corresponds to the time of reaction in hours.

For every reaction, the time for reaction was 120 min (2 h) and weight of catalyst used was 0.025 g and amount of water used was 0.050 L.

#### For NNO:

Ammonia yield = 3  $\mu\text{mol}$

So, Yield = 3  $\mu\text{mol g}^{-1} \text{h}^{-1}$

#### For DNN01:

Ammonia yield = 23  $\mu\text{mol}$

So, Yield = 23  $\mu\text{mol g}^{-1} \text{h}^{-1}$

#### For DNN02:

Ammonia yield = 26  $\mu\text{mol}$

So, Yield = 26  $\mu\text{mol g}^{-1} \text{h}^{-1}$

#### For DNN03:

Ammonia yield = 18  $\mu\text{mol}$

So, Yield = 18  $\mu\text{mol g}^{-1} \text{h}^{-1}$

#### For NVNO0.25:

Ammonia yield = 36  $\mu\text{mol}$

So, Yield = 36  $\mu\text{mol g}^{-1} \text{h}^{-1}$

#### For NVNO0.50:

Ammonia yield = 22  $\mu\text{mol}$

So, Yield = 22  $\mu\text{mol g}^{-1} \text{h}^{-1}$

#### For NVNO0.75:

Ammonia yield = 15  $\mu\text{mol}$

So, Yield = 15  $\mu\text{mol g}^{-1} \text{h}^{-1}$



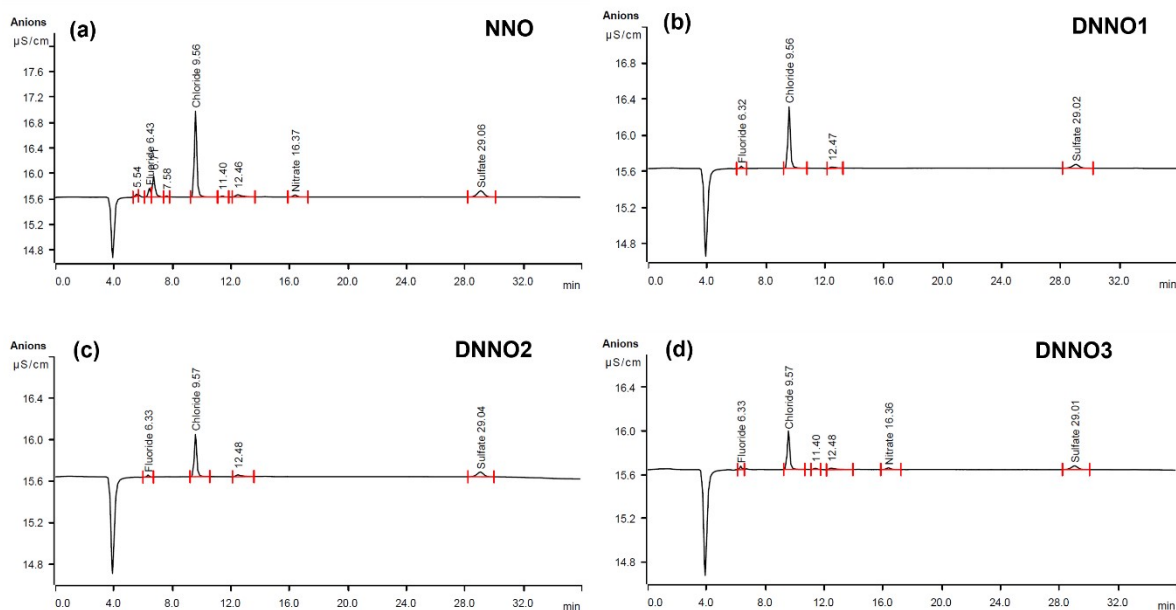

**Figure S7.** Ion chromatogram for  $\text{NO}_3^-$  detection of (a) NNO, (b) DNNO1, (c) DNNO2, (d) DNNO3, respectively.



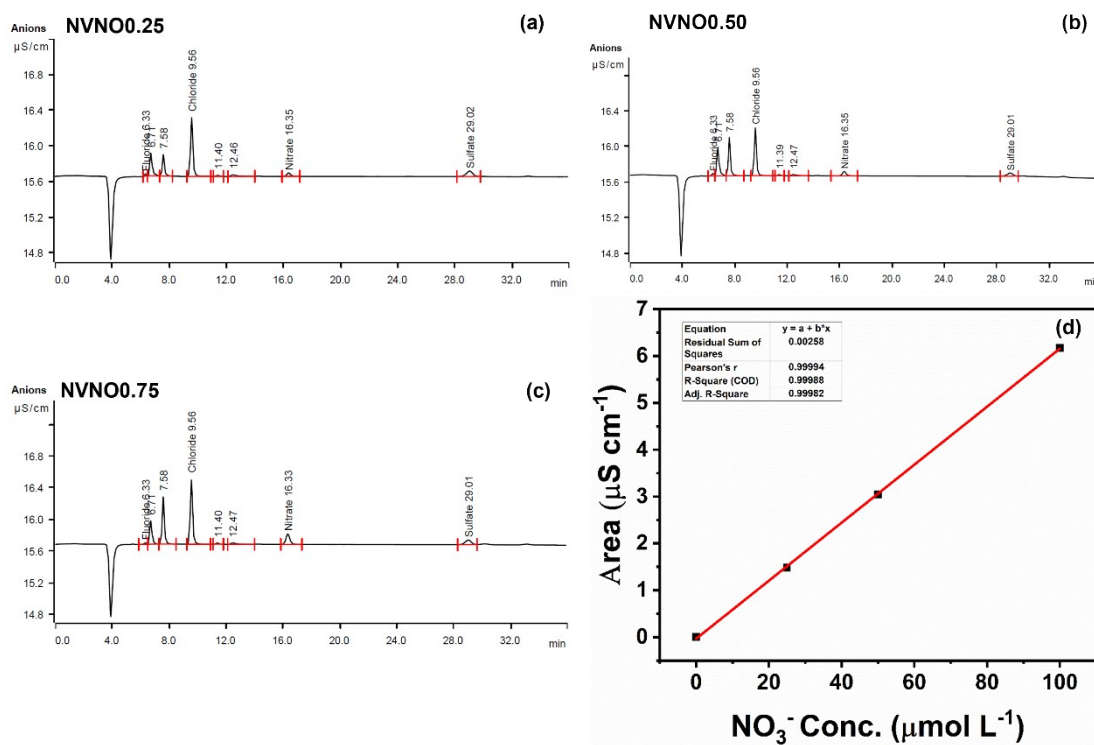

**Figure S8.** Ion chromatogram for  $\text{NO}_3^-$  detection of (a) NVNO0.25, (b) NVNO0.50, (c) NVNO0.75, (d) Calibration curve of  $\text{NO}_3^-$  ions using ion chromatography, respectively.

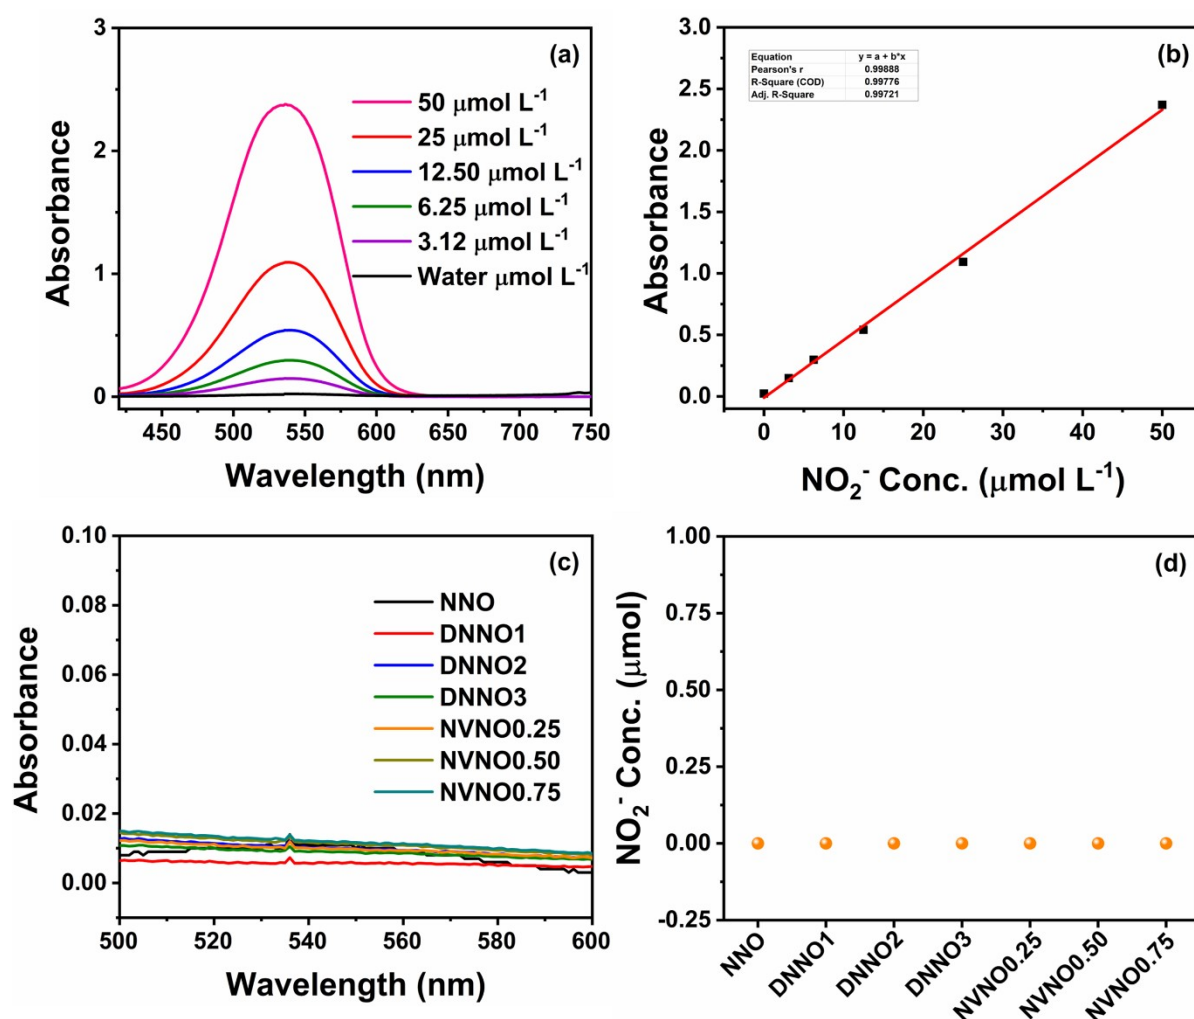

**Figure S9.** (a, b) Calibration curves for determination of  $\text{NO}_2^-$  ions, (c) UV-vis absorption for  $\text{NO}_2^-$ , (d) histogram of  $\text{NO}_2^-$  concentration produced in NNO, DNNO1, DNNO2, DNNO3, NVNO0.25, NVNO0.50 and NVNO0.75, respectively.

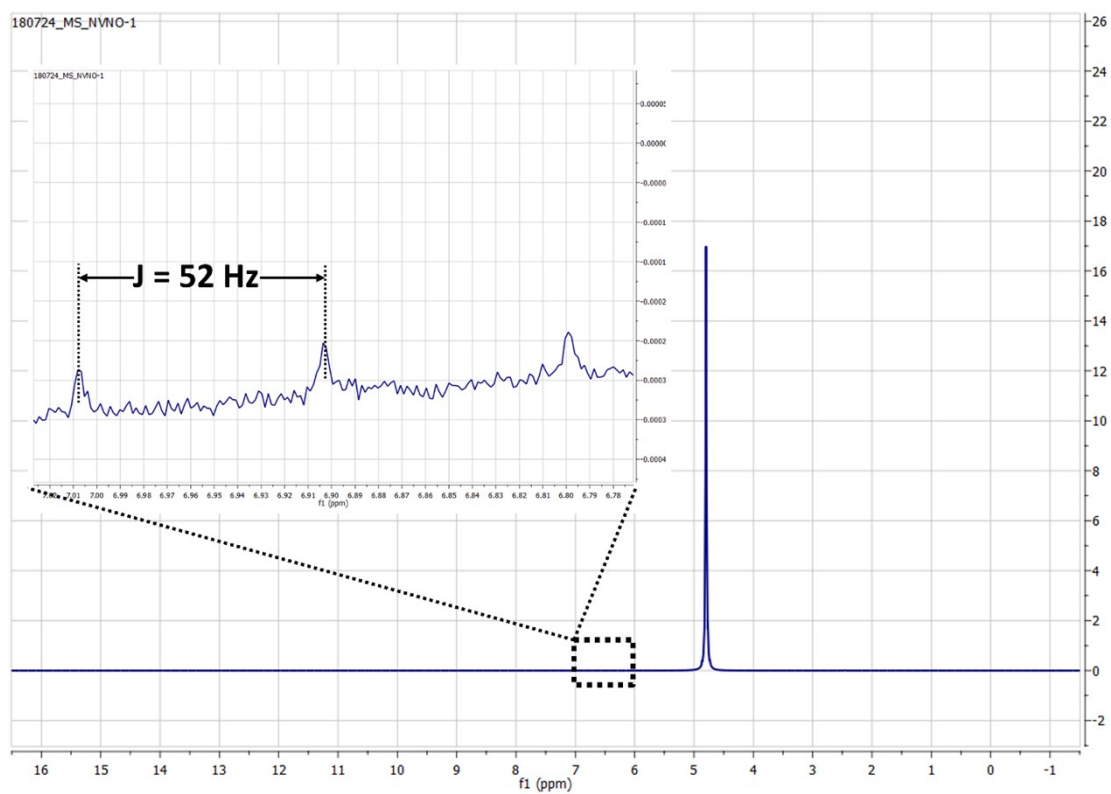

**Figure S10.**  $^1\text{H}$ -NMR of the  $\text{NH}_3$  obtained from the reaction mixture.

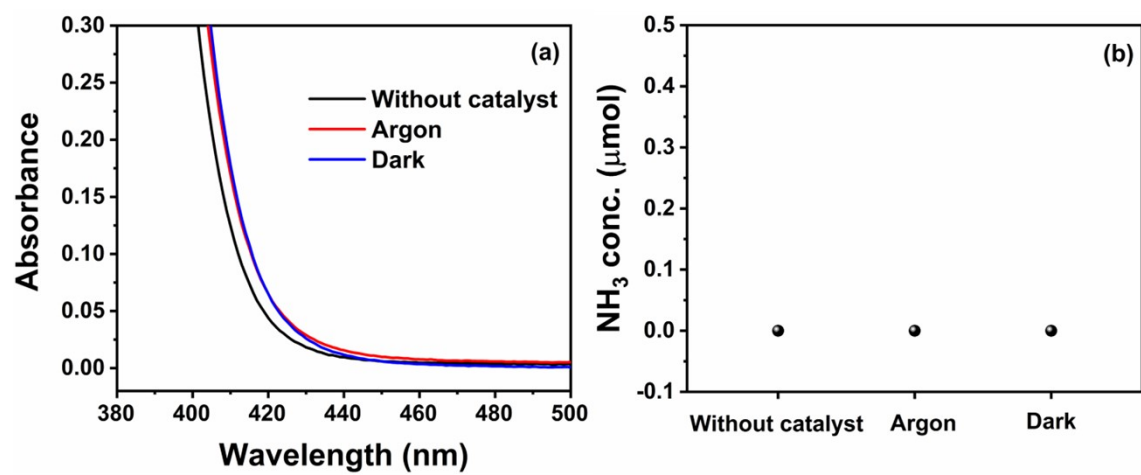

**Figure S11.** (a) UV-vis absorption spectra; (b)  $\text{NH}_3$  concentration produced in control reaction conditions.

### S6. Calculation of light to chemical (LCC) efficiency:

The light to chemical conversion efficiency was calculated using the equation:<sup>4</sup>

$$\text{LCC} = \frac{\Delta G \text{ (Jmol}^{-1}\text{)} \times \text{NH}_3\text{(mol)}}{\text{Total Energy Input (W)} \times \text{Reaction time (s)}} \times 100$$

**For visible light**, flux measured = 48900 lux.

$$\begin{aligned}\text{In Wm}^{-2}, \text{ calculated flux} &= 48900 \times 0.0079 \\ &= 386.3 \text{ W m}^{-2}\end{aligned}$$

$$\text{Irradiated surface area} = 84.78 \times 10^{-4} \text{ m}^2$$

$$\Delta G \text{ in NH}_3 \text{ synthesis} = 339 \text{ kJ mol}^{-1} = 339 \times 1000 \text{ J mol}^{-1}$$

**(a) NNO** = 3  $\mu\text{mol}$

Therefore, calculated LCC = 0.0045%

**(b) DNNO2** = 26  $\mu\text{mol}$

Therefore, calculated LCC = 0.033%

**(b) NVNO0.25** = 36  $\mu\text{mol}$

Therefore, calculated LCC = 0.052%

**(a) In sunlight, For NNO**, In  $\text{Wm}^{-2}$ , calculated flux =  $63000 \times 0.0079$   
 $= 497.7 \text{ W m}^{-2}$

$$\text{Calculated NH}_3 \text{ yield} = 12 \mu\text{mol}$$

Therefore, calculated LCC = 0.013%

**(b) For DNNO2**, In  $\text{Wm}^{-2}$ , calculated flux =  $64600 \times 0.0079$   
 $= 510.3 \text{ W m}^{-2}$

$$\text{Calculated NH}_3 \text{ yield} = 36 \mu\text{mol}$$

Therefore, calculated LCC = 0.039%

**(b) For NVNO0.25**, In  $\text{Wm}^{-2}$ , calculated flux =  $65000 \times 0.0079$   
 $= 513.5 \text{ W m}^{-2}$

$$\text{Calculated NH}_3 \text{ yield} = 44 \mu\text{mol}$$

Therefore, calculated LCC = 0.048%

### S7. Calculation of turnover frequency (TOF) for NH<sub>3</sub> generation under visible light

The TOF has been calculated using the following equation:<sup>5</sup>

$$\text{TOF} = \frac{\text{Number of moles of NH}_3 \text{ generated per hour}}{\text{Number of active sites}}$$

#### (a) For NNO,

Amount of NH<sub>3</sub> generated in 2 h: 3 μmol

Number of active sites (From TPD analysis): 0.343 mmol g<sup>-1</sup>

Amount of catalyst used in the reaction: 25 mg = 0.025 g

Therefore, TOF = 0.009 h<sup>-1</sup>

#### (b) For DNNO<sub>2</sub>,

Amount of NH<sub>3</sub> generated in 2 h: 26 μmol

Number of active sites (From TPD analysis): 0.337 mmol g<sup>-1</sup>

Amount of catalyst used in the reaction: 25 mg = 0.025 g

Therefore, TOF = 0.077 h<sup>-1</sup>

#### (b) For NVNO<sub>0.25</sub>,

Amount of NH<sub>3</sub> generated in 2 h: 36 μmol

Number of active sites (From TPD analysis): 0.379 mmol g<sup>-1</sup>

Amount of catalyst used in the reaction: 25 mg = 0.025 g

Therefore, TOF = 0.095 h<sup>-1</sup>

### S8. Calculation of turnover frequency (TOF) for NH<sub>3</sub> generation under sunlight

The TOF has been calculated using the following equation:<sup>5</sup>

$$\text{TOF} = \frac{\text{Number of moles of NH}_3 \text{ generated per hour}}{\text{Number of active sites}}$$

#### (a) For NNO,

Amount of NH<sub>3</sub> generated in 2 h: 12 μmol

Number of active sites (From TPD analysis): 0.343 mmol g<sup>-1</sup>

Amount of catalyst used in the reaction: 25 mg = 0.025 g

Therefore, TOF = 0.035 h<sup>-1</sup>

#### (b) For DNNO,

Amount of NH<sub>3</sub> generated in 2 h: 36 μmol

Number of active sites (From TPD analysis): 0.337 mmol g<sup>-1</sup>

Amount of catalyst used in the reaction: 25 mg = 0.025 g

Therefore, TOF = 0.110 h<sup>-1</sup>

#### (c) For NVNO0.25,

Amount of NH<sub>3</sub> generated in 2 h: 44 μmol

Number of active sites (From TPD analysis): 0.379 mmol g<sup>-1</sup>

Amount of catalyst used in the reaction: 25 mg = 0.025 g

Therefore, TOF = 0.120 h<sup>-1</sup>

**Table S2.** Comparison of photoactivity of different materials.

| Sl. | Photocatalyst                             | Reaction Medium                               | NH <sub>3</sub> Production<br>( $\mu\text{mol g}^{-1} \text{h}^{-1}$ ) | NO <sub>2</sub> <sup>-</sup> /NO <sub>3</sub> <sup>-</sup> Production<br>( $\mu\text{mol g}^{-1} \text{h}^{-1}$ ) | Year <sup>Ref.</sup> |
|-----|-------------------------------------------|-----------------------------------------------|------------------------------------------------------------------------|-------------------------------------------------------------------------------------------------------------------|----------------------|
| 1.  | Ni-doped TiO <sub>2</sub>                 | Water                                         | 46.80                                                                  | Not detected                                                                                                      | 2020 <sup>6</sup>    |
| 2.  | Fe-doped TiO <sub>2</sub> nanofibers      | Water                                         | 64.20                                                                  | Not detected                                                                                                      | 2021 <sup>7</sup>    |
| 3.  | WO <sub>3-x</sub>                         | 1 mM Na <sub>2</sub> SO <sub>3</sub> solution | 82.41                                                                  | Not detected                                                                                                      | 2022 <sup>8</sup>    |
| 4.  | CDS/WO <sub>3</sub>                       | Water                                         | 35.80                                                                  | No NO <sub>2</sub> <sup>-</sup> /14.20                                                                            | 2022 <sup>9</sup>    |
| 5.  | In-doped Bi <sub>2</sub> MoO <sub>6</sub> | Water                                         | 53.40                                                                  | No NO <sub>2</sub> <sup>-</sup> /54.00                                                                            | 2023 <sup>10</sup>   |
| 6.  | Oxygen Vacancy rich NaNbO <sub>3</sub>    | Water                                         | 26.00                                                                  | Not found                                                                                                         | This Work            |
|     | V-doped NaNbO <sub>3</sub>                |                                               | 36.00                                                                  | No NO <sub>2</sub> <sup>-</sup> /2.00                                                                             |                      |



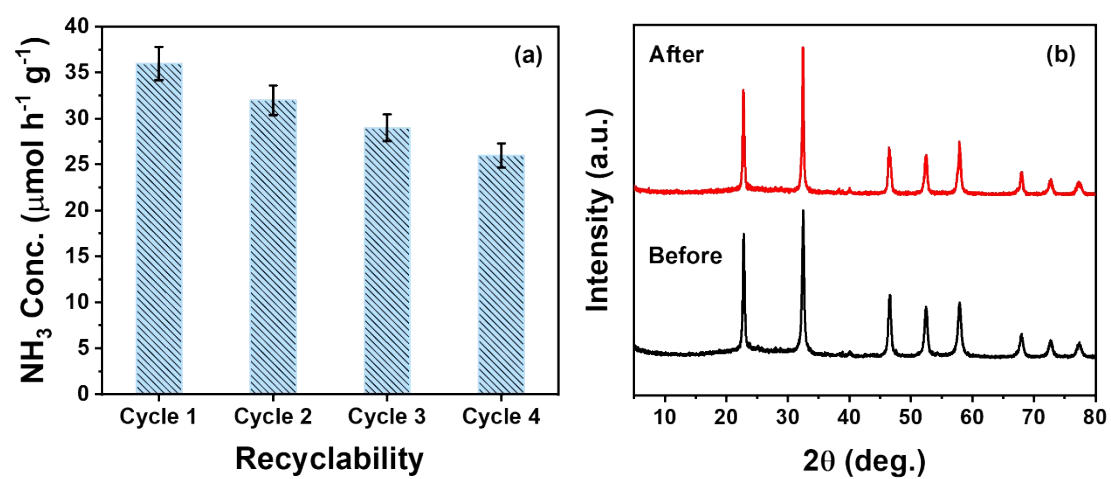

**Figure S12.** (a, b)  $\text{NH}_3$  concentration after 4 cycles; (b) PXRD pattern of  $\text{NVNO}_{0.25}$  before and after photocatalysis experiments.

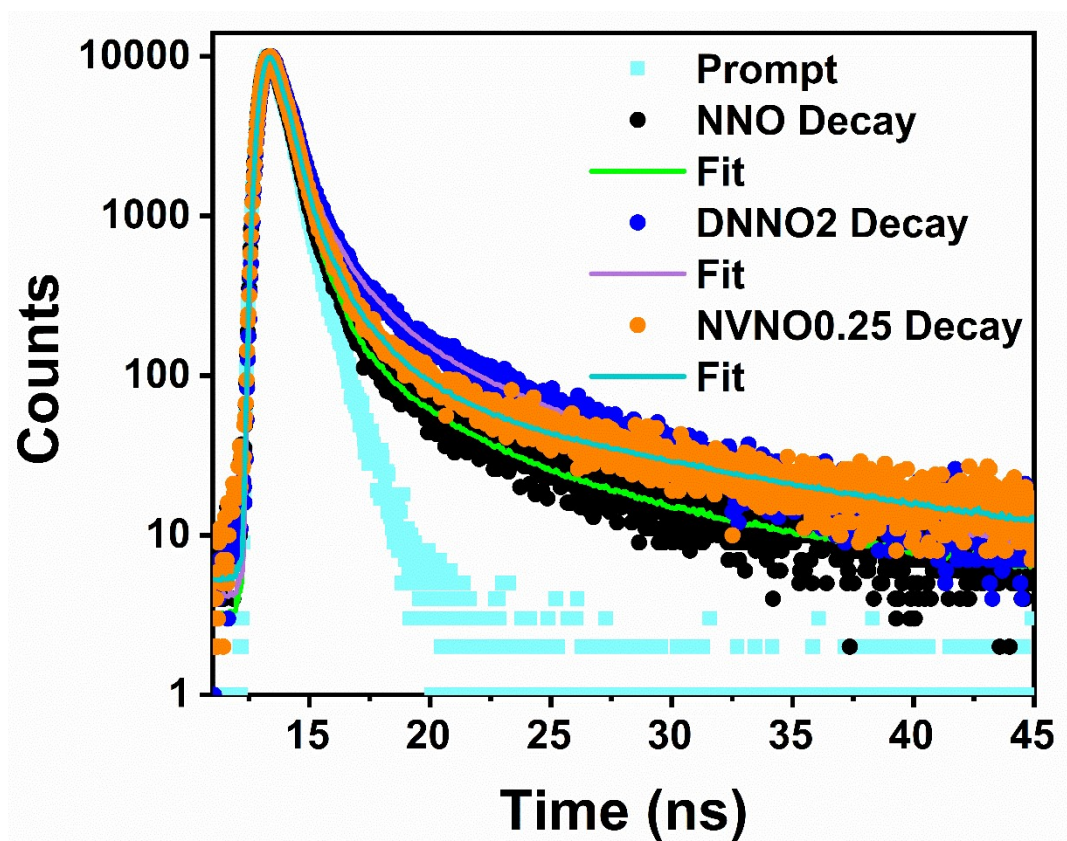

**Figure S13.** Lifetime decay curves of NNO, DNNO2 and NVNO0.25; reconvolution fitting to the decay curves are indicated.

## References

1. M. Sharma, A. Kumar, D. Gill, S. Jaiswal, A. Patra, S. Bhattacharya and V. Krishnan, *ACS Applied Materials & Interfaces*, 2023, **15**, 55765-55778.
2. X. Zhao, X. Lan, D. Yu, H. Fu, Z. Liu and T. Mu, *Chemical Communications*, 2018, **54**, 13010-13013.
3. S. Zhang, Y. Zhao, R. Shi, C. Zhou, G. I. Waterhouse, L. Z. Wu, C. H. Tung and T. Zhang, *Advanced Energy Materials*, 2020, **10**, 1901973.
4. Y. Shiraishi, S. Shiota, Y. Kofuji, M. Hashimoto, K. Chishiro, H. Hirakawa, S. Tanaka, S. Ichikawa and T. Hirai, *ACS Applied Energy Materials*, 2018, **1**, 4169-4177.
5. G. Wang, B. Li, B. Li and L. Wu, *Green Chemistry*, 2023, **25**, 10556-10566.
6. J. Li, D. Wang, R. Guan, Y. Zhang, Z. Zhao, H. Zhai and Z. Sun, *ACS Sustainable Chemistry & Engineering*, 2020, **8**, 18258-18265.
7. Y. Bo, H. Wang, Y. Lin, T. Yang, R. Ye, Y. Li, C. Hu, P. Du, Y. Hu and Z. Liu, *Angewandte Chemie International Edition*, 2021, **60**, 16085-16092.
8. Z. Yang, J. Wang, J. Wang, M. Li, Q. Cheng, Z. Wang, X. Wang, J. Li, Y. Li and G. Zhang, *Langmuir*, 2022, **38**, 1178-1187.
9. P. Xia, X. Pan, S. Jiang, J. Yu, B. He, P. M. Ismail, W. Bai, J. Yang, L. Yang and H. Zhang, *Advanced Materials*, 2022, **34**, 2200563.
10. T. Ma, C. Yang, L. Guo, R. A. Soomro, D. Wang, B. Xu and F. Fu, *Applied Catalysis B: Environmental*, 2023, **330**, 122643.
